# Supplementary material for: Genetic Profiling of Cell-Free DNA in Liquid Biopsies: A Complementary Tool for the Diagnosis of B-Cell Lymphomas and the Surveillance of Measurable Residual Disease
Source: MDPI journal article supplement (doi:10.3390/cancers15164022), 2023-08-08
Supplement: s1 [file s1]

# Genetic Profiling of Cell-Free DNA in Liquid Biopsies: A Complementary Tool for the Diagnosis of B-Cell Lymphomas and the Surveillance of Measurable Residual Disease

Gloria Figaredo \*, Alejandro Martín-Muñoz, Santiago Barrio, Laura Parrilla, Yolanda Campos-Martín, María Poza, Laura Rufian, Patrocinio Algara, Marina De La Torre, Ana Jiménez Ubieto, Joaquín Martínez-López, Luis-Felipe Casado and Manuela Mollejo

**Table S1.** Genes included in the panel at diagnosis.

| <i>ARID1A</i> | <i>CXCR4</i>    | <i>NOTCH1</i>   |
|---------------|-----------------|-----------------|
| <i>ARID1B</i> | <i>EP300</i>    | <i>P2RY8</i>    |
| <i>B2M</i>    | <i>ETS1</i>     | <i>PAX5</i>     |
| <i>BCL10</i>  | <i>EZH2</i>     | <i>PCB1</i>     |
| <i>BCL2</i>   | <i>FOXO1</i>    | <i>PIM1</i>     |
| <i>BCL7A</i>  | <i>GNA13</i>    | <i>PIM2</i>     |
| <i>BRAF</i>   | <i>HIST1H1E</i> | <i>PRDM1</i>    |
| <i>BTG1</i>   | <i>HNRNPK</i>   | <i>RRAGC</i>    |
| <i>BTK</i>    | <i>ID3</i>      | <i>S1PR2</i>    |
| <i>CARD11</i> | <i>IKZF3</i>    | <i>SMARCA4</i>  |
| <i>CCND3</i>  | <i>IRF4</i>     | <i>SOCS1</i>    |
| <i>CD58</i>   | <i>IRF8</i>     | <i>STAT3</i>    |
| <i>CD79A</i>  | <i>ITPKB</i>    | <i>STAT6</i>    |
| <i>CD79B</i>  | <i>KMT2D</i>    | <i>TCF3</i>     |
| <i>CDKN2A</i> | <i>MEF2B</i>    | <i>TNFAIP3</i>  |
| <i>CDKN2B</i> | <i>MFHAS1</i>   | <i>TNFRSF14</i> |
| <i>CIITA</i>  | <i>MUM1</i>     | <i>TP53</i>     |
| <i>CREBBP</i> | <i>MYC</i>      | <i>XPO1</i>     |
| <i>CTSS</i>   | <i>MYD88</i>    |                 |
